# Supplementary material for: Glutamate Metabolism in Major Depressive Disorder
Source: Atypon-hosted journal article supplement (doi:10.1176/appi.ajp.2014.14010067), 2014-12-01
Supplement: appi.ajp.2014.14010067_ds001.pdf [file appi.ajp.2014.14010067_ds001.pdf]

**TABLE S1.** Equations Used in CWave Software to Calculate Metabolic Rates

### Mass Balance Equations

$$\begin{aligned}d\text{Glu}_N/\text{dt} &= V_{\text{cycle}} + V_{\text{pdhN}} + V_{\text{dilN}} - (V_{\text{tcaN}} + V_{\text{cycle}}) = 0 \\d\text{Glu}_A/\text{dt} &= V_{\text{cycle}} + V_{\text{pdhA}} + V_{\text{dilA}} - (V_{\text{gln}} + V_{\text{tcaANet}}) = 0 \\d\text{Gln}/\text{dt} &= V_{\text{gln}} - (V_{\text{cycle\_GABA}} + V_{\text{cycle}} + V_{\text{efflux}}) = 0 \\d\text{Glu}_{\text{GABA}}/\text{dt} &= V_{\text{cycle\_GABA}} + V_{\text{pdhGABA}} + V_{\text{dilGluGABA}} - (V_{\text{gad}} + V_{\text{tcaGABANet}}) = 0 \\d\text{GABA}/\text{dt} &= V_{\text{gad}} - (V_{\text{shunt}} + V_{\text{cycle\_GABA}}) = 0 \\d\text{TCANIntmd}_N/\text{dt} &= 0 \\d\text{TCAIntmd}_{\text{gaba}}/\text{dt} &= 0 \\d\text{TCAIntmd}_A/\text{dt} &= 0 \\d\text{Lactate}/\text{dt} &= 2 \times \text{CMR}_{\text{gl}} - (V_{\text{ana}} + V_{\text{pdhA}} + V_{\text{pdhN}} + V_{\text{pdhGABA}}) = 0 \\d\text{Glucose}/\text{dt} &= V_{\text{max\_Glc\_in}} (\text{Plasma\_Glucose}) / (K_{\text{m\_Glc\_in}} + \text{Plasma\_Glucose}) - [\text{CMR}_{\text{gl}} + \\&\quad (V_{\text{max\_Glc\_out}}) (\text{Glucose}) / (K_{\text{m\_Glc\_out}} + \text{Glucose})] = 0\end{aligned}$$

### Isotope Balance Equations

$$\begin{aligned}d\text{Glu}_{\text{N4}}/\text{dt} &= V_{\text{cycle}} (\text{Gln}_4/\text{Gln}) + V_{\text{pdhN}} (\text{Lactate}_3/\text{Lactate}) + V_{\text{dilN}} (0) - [V_{\text{tcaN}} + V_{\text{cycle}}] \\&\quad (\text{Glu}_{\text{N4}}/\text{Glu}_N) \\d\text{Glu}_{\text{A4}}/\text{dt} &= V_{\text{cycle}} (\text{Glu}_{\text{N4}}/\text{Glu}_N) + V_{\text{pdhA}} (\text{Lactate}_3/\text{Lactate}) + V_{\text{dilA}} (\text{NA}_0/\text{NA}) - [V_{\text{gln}} + V_{\text{tcaANet}}] \\&\quad (\text{Glu}_{\text{A4}}/\text{Glu}_A) \\d\text{Gln}_4/\text{dt} &= V_{\text{gln}} (\text{Glu}_{\text{A4}}/\text{Glu}_A) - [V_{\text{cycle\_GABA}} + V_{\text{cycle}} + V_{\text{efflux}}] (\text{Gln}_4/\text{Gln}) \\d\text{Glu}_{\text{N3}}/\text{dt} &= V_{\text{tcaN}} (\text{TCANIntmd}_{\text{N2}}/\text{TCANIntmd}_N) + V_{\text{cycle}} (\text{Gln}_3/\text{Gln}) - [V_{\text{tcaN}} + V_{\text{cycle}}] \\&\quad (\text{Glu}_{\text{N3}}/\text{Glu}_N) \\d\text{Gln}_3/\text{dt} &= V_{\text{gln}} (\text{Glu}_{\text{A3}}/\text{Glu}_A) - [V_{\text{cycle\_GABA}} + V_{\text{cycle}} + V_{\text{efflux}}] (\text{Gln}_3/\text{Gln}) \\d\text{Glu}_{\text{A3}}/\text{dt} &= V_{\text{cycle}} (\text{Glu}_{\text{N3}}/\text{Glu}_N) + V_{\text{tcaANet2}} (\text{TCAIntmd}_{\text{A2}}/\text{TCAIntmd}_A) - [V_{\text{gln}} + V_{\text{tcaANet}}] \\&\quad (\text{Glu}_{\text{A3}}/\text{Glu}_A) \\d\text{Glu}_{\text{GABA4}}/\text{dt} &= V_{\text{cycle\_GABA}} (\text{Gln}_4/\text{Gln}) + V_{\text{pdhGABA}} (\text{Lactate}_3/\text{Lactate}) + V_{\text{dilGluGABA}} (\text{NA}_0/\text{NA}) - \\&\quad [V_{\text{gad}} + V_{\text{tcaGABANet}}] (\text{Glu}_{\text{GABA4}}/\text{Glu}_{\text{GABA}}) \\d\text{Glu}_{\text{GABA3}}/\text{dt} &= V_{\text{cycle\_GABA}} (\text{Gln}_3/\text{Gln}) + V_{\text{tcaGABA}} (\text{TCAIntmd}_{\text{gaba2}}/\text{TCAIntmd}_{\text{gaba}}) - [V_{\text{gad}} + \\&\quad V_{\text{tcaGABANet}}] (\text{Glu}_{\text{GABA3}}/\text{Glu}_{\text{GABA}}) \\d\text{GABA}_2/\text{dt} &= V_{\text{gad}} (\text{Glu}_{\text{GABA4}}/\text{Glu}_{\text{GABA}}) - [V_{\text{shunt}} + V_{\text{cycle\_GABA}}] (\text{GABA}_2/\text{GABA}) \\d\text{GABA}_3/\text{dt} &= V_{\text{gad}} (\text{Glu}_{\text{GABA3}}/\text{Glu}_{\text{GABA}}) - [V_{\text{shunt}} + V_{\text{cycle\_GABA}}] (\text{GABA}_3/\text{GABA}) \\d\text{TCANIntmd}_{\text{N2}}/\text{dt} &= 1/2 V_{\text{tcaN}} (\text{Glu}_{\text{N4}}/\text{Glu}_N) + 1/2 V_{\text{tcaN}} (\text{Glu}_{\text{N3}}/\text{Glu}_N) + V_{\text{dilC3}} (\text{NA}_0/\text{NA}) - [V_{\text{tcaN}} \\&\quad + V_{\text{dilC3}}] (\text{TCANIntmd}_{\text{N2}}/\text{TCANIntmd}_N) \\d\text{TCAIntmd}_{\text{gaba2}}/\text{dt} &= 1/2 V_{\text{tcaGABANet}} (\text{Glu}_{\text{GABA4}}/\text{Glu}_{\text{GABA}}) + 1/2 V_{\text{tcaGABANet}} (\text{Glu}_{\text{GABA3}}/\text{Glu}_{\text{GABA}}) + \\&\quad 1/2 V_{\text{shunt}} (\text{GABA}_2/\text{GABA}) + 1/2 V_{\text{shunt}} (\text{GABA}_3/\text{GABA}) - V_{\text{tcaGABA}} \\&\quad (\text{TCAIntmd}_{\text{gaba2}}/\text{TCAIntmd}_{\text{gaba}})\end{aligned}$$

$$\begin{aligned}
d\text{TCAIntmd}_{A2}/dt &= 1/2 V_{\text{cycle\_GABA}} (\text{GABA}_2/\text{GABA}) + 1/2 V_{\text{cycle\_GABA}} (\text{GABA}_3/\text{GABA}) + 1/2 \\
&\quad V_{\text{tcaANet}} (\text{Glu}_{A4}/\text{Glu}_A) + 1/2 V_{\text{tcaANet}} (\text{Glu}_{A3}/\text{Glu}_A) + V_{\text{ana}} (\text{Lactate}_3/\text{Lactate}) - V_{\text{tcaANet}2} \\
&\quad (\text{TCAIntmd}_{A2}/\text{TCAIntmd}_A) \\
d\text{Lactate}_3/dt &= \text{CMR}_{\text{gl}} (\text{Glucose}_1/\text{Glucose}) - [V_{\text{ana}} + V_{\text{pdhA}} + V_{\text{pdhN}} + V_{\text{pdhGABA}}] (\text{Lactate}_3/\text{Lactate}) \\
d\text{Glucose}_1/dt &= V_{\text{max\_Glc\_in}} (\text{Plasma\_Glucose}_1) / (K_{\text{m\_Glc\_in}} + \text{Plasma\_Glucose}_1) - [\text{CMR}_{\text{gl}} + \\
&\quad V_{\text{max\_Glc\_out}} (\text{Glucose}) / (K_{\text{m\_Glc\_out}} + \text{Glucose})] (\text{Glucose}_1/\text{Glucose})
\end{aligned}$$

## Variables

$\text{Glu}_{\text{Total}4} = \text{Glu}_{A4} + \text{Glu}_{N4} + \text{Glu}_{\text{GABA}4}$ ;  $\text{Glu}_{\text{Total}3} = \text{Glu}_{A3} + \text{Glu}_{N3} + \text{Glu}_{\text{GABA}3}$ ;  $\text{Glx}_3 = \text{Gln}_3 + \text{Glu}_{A3} + \text{Glu}_{\text{GABA}3} + \text{Glu}_{N3}$ ;  $\text{CMR}_{\text{gl}} = (V_{\text{pdhA}} + V_{\text{pdhN}} + V_{\text{pdhGABA}} + V_{\text{ana}}) / 2$  = cerebral metabolic rate of glucose;  $V_{\text{cycle}}$  = glutamate/glutamine neuron transmitter cycle, iterated;  $V_{\text{pdhN}}$  = neuronal pyruvate dehydrogenase rate, iterated;  $V_{\text{tcaN}} = V_{\text{pdhN}} + V_{\text{dilN}}$  = neuronal TCA cycle rate;  $V_{\text{shunt}} = \text{GABA shunt rate, iterated}$ ;  $V_{\text{cycle\_GABA}}$  = rate of GABA/glutamine cycling;  $V_{\text{gad}} = V_{\text{shunt}} + V_{\text{cycle\_GABA}}$  = GABA synthesis rate;  $V_{\text{ana}}$  = anaplerotic flux;  $V_{\text{efflux}} = V_{\text{ana}}$  = glutamine efflux, balanced by  $V_{\text{ana}}$ ;  $V_{\text{gln}} = V_{\text{cycle}} + V_{\text{cycle\_GABA}} + V_{\text{efflux}}$  = glutamine synthesis rate;  $V_{\text{pdhA}}$  = astrocytic pyruvate dehydrogenase rate;  $V_{\text{tcaA}} = V_{\text{pdhA}} + V_{\text{dilA}}$  = astrocytic TCA cycle rate;  $V_{\text{pdhGABA}} = V_{\text{tcaGABA}} - V_{\text{dilGluGABA}}$  = GABAergic pyruvate dehydrogenase rate;  $V_{\text{tcaANet}} = V_{\text{tcaA}} - V_{\text{gln}} + V_{\text{cycle}}$  = astrocytic TCA cycle rate from alpha-KG to succinate;  $V_{\text{tcaANet}2} = V_{\text{tcaANet}} + V_{\text{cycle\_GABA}} + V_{\text{ana}}$  = astrocytic TCA cycle rate from succinate to oxaloacetate;  $V_{\text{tcaGABANet}} = \text{GABAergic neuronal TCA cycle rate from a-KG to succinate}$ ;  $V_{\text{tcaGABA}} = V_{\text{tcaGABANet}} + V_{\text{shunt}}$  = GABAergic TCA cycle rate;  $\text{FracGlu}_A$  = fraction of total glutamate that resides in astroglial;  $\text{FracGlu}_{\text{GABA}}$  = fraction of total glutamate that resides in GABAergic neuron;  $K_{\text{m\_Glc\_in}}$  = Michaelis-Menten half-saturation constant for blood-brain glucose transport;  $K_{\text{m\_Glc\_out}} = V_d \times K_{\text{m\_Glc\_in}}$  = Michaelis-Menten half saturation constant for brain-blood glucose transport;  $V_d$  = distribution space of brain water;  $V_{\text{dilA}}$  = astrocytic dilution of acetyl CoA, iterated;  $V_{\text{dilC3}}$  = neuronal dilution of glutamate C3 relative to C4, iterated;  $V_{\text{dilGluGABA}}$  = GABAergic neuronal dilution of acetyl CoA, iterated;  $V_{\text{dilN}}$  = glutamatergic neuronal silution of acetyl CoA, iterated;  $V_{\text{max\_Glc\_in}}$  = maximum rate of blood-brain glucose transport;  $V_{\text{max\_Glc\_out}} = V_{\text{max\_Glc\_in}}$  = maximum rate if brain-blood glucose transport;  $\text{GABA}$  = total brain GABA concentration;  $\text{Gln}$  = total brain glutamine concentration;  $\text{Glu}$  = total brain glutamate concentration;  $\text{Glu}_A = \text{FracGlu}_A \times \text{Glu}_{\text{Total}}$  = astrocytic glutamate concentration;  $\text{Glu}_N = \text{Glu}_{\text{Total}} - \text{Glu}_A - \text{Glu}_{\text{GABA}}$  = neuronal glutamate concentration;  $\text{Glu}_{\text{GABA}} = \text{FracGlu}_{\text{GABA}} \times \text{Glu}_{\text{Total}}$  = GABAergic glutamate concentration;  $\text{TCAIntmd}_A$  = astrocytic TCA cycle intermediates;  $\text{TCAIntmd}_{\text{gaba}}$  = GABAergic neuronal TCA cycle intermediates;  $\text{TCAIntmd}_N$  = glutamatergic neuronal TCA cycle intermediates

**TABLE S2. Comparison of Occipital Metabolites**

| Metabolite          | Depression<br>Group<br>(N=23) | Healthy Group<br>(N=17) | <i>t</i> | <i>df</i> | <i>p</i> |
|---------------------|-------------------------------|-------------------------|----------|-----------|----------|
|                     | Mean $\pm$ SD                 | Mean $\pm$ SD           |          |           |          |
| GABA (mmol/kg)      | 1.12 $\pm$ 0.10               | 1.12 $\pm$ 0.12         | 0.04     | 38        | 0.97     |
| Glutamine (mmol/kg) | 2.32 $\pm$ 0.72               | 2.51 $\pm$ 0.70         | 0.54     | 38        | 0.41     |
| Glutamate (mmol/kg) | 7.42 $\pm$ 1.44               | 7.47 $\pm$ 1.57         | 0.36     | 38        | 0.92     |

**FIGURE S1. Scatter of Occipital GABA Levels**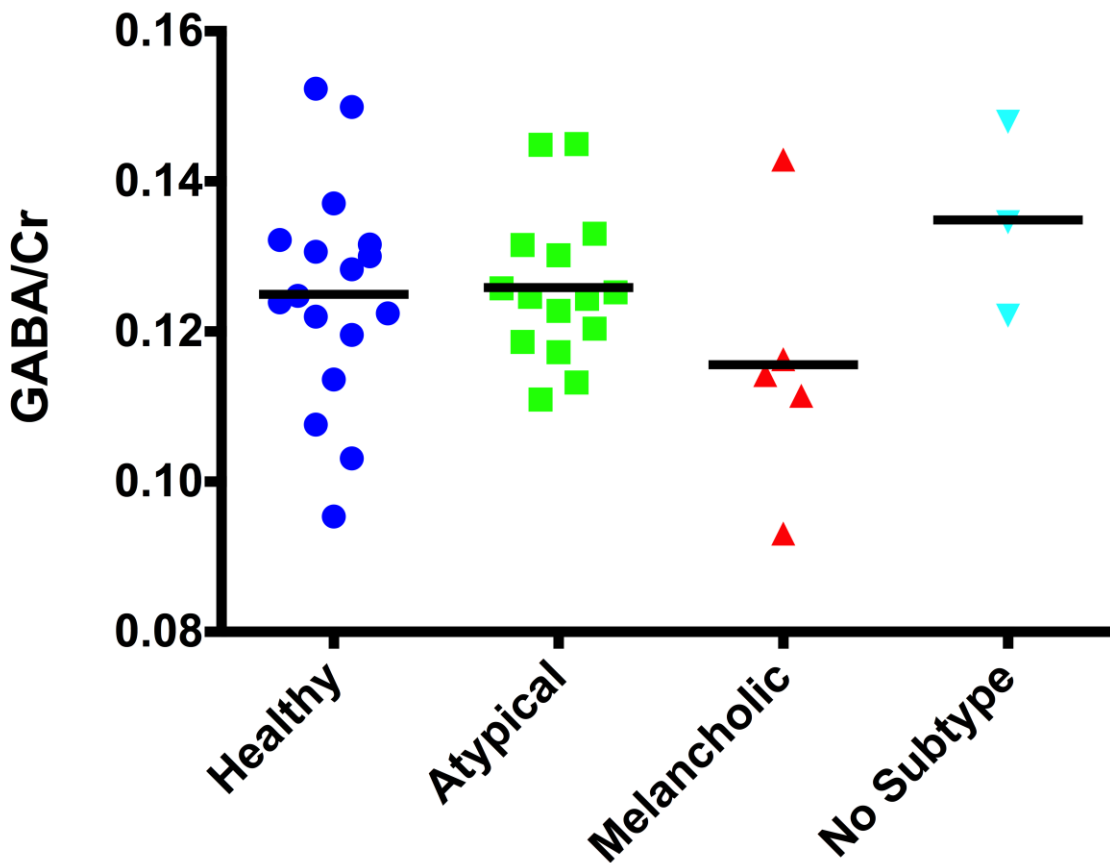

**TABLE S3. Correlations (Spearman's Correlation Coefficient) Between Clinical And Spectroscopy Measures in the Depression Group**

|                               | HAM-D             | HAM-A              | BDI   | Number of Episodes (Lifetime) |
|-------------------------------|-------------------|--------------------|-------|-------------------------------|
| V <sub>TCAN</sub>             | 0.19              | -0.37 <sup>‡</sup> | 0.09  | 0.19                          |
| V <sub>cycle</sub>            | 0.15              | 0.10               | 0.29  | -0.26                         |
| V <sub>GAD</sub> <sup>a</sup> | 0.14              | -0.17              | 0.07  | -0.21                         |
| GABA                          | 0.03              | -0.14              | -0.09 | -0.10                         |
| Glutamine                     | -0.03             | <b>-0.47 *</b>     | -0.23 | 0.23                          |
| Glutamate <sup>b</sup>        | 0.39 <sup>‡</sup> | 0.19               | 0.36  | <b>-0.59 *</b>                |

<sup>a</sup> V<sub>GAD</sub> was excluded for three participants with noise level higher than 0.05  $\mu\text{mol/g/min}$ .

<sup>b</sup> One subject had poor spectral fitting for Glu and Glx.

**Abbreviations:** HAM-D: Hamilton Depression Rating Scale; HAM-A: Hamilton Anxiety Rating Scale; BDI: Beck Depression Inventory.

\*p<0.05. <sup>‡</sup>p<0.1

**TABLE S4. Correlations Between V<sub>TCAN</sub> and V<sub>cycle</sub>**

|            |                    | Healthy                            | MDD               |
|------------|--------------------|------------------------------------|-------------------|
|            |                    | V <sub>TCAN</sub>                  | V <sub>TCAN</sub> |
| Healthy    | V <sub>cycle</sub> | r <sub>s</sub> =0.44, N=17, p=0.08 |                   |
| Depression | V <sub>cycle</sub> | r <sub>s</sub> =0.25, N=23, p=0.25 |                   |
